# Supplementary material for: Product quality and catalyst deactivation in a four day catalytic fast pyrolysis production run
Source: Royal Society of Chemistry journal article supplement (doi:10.1039/c4gc00571f), 2014-01-01
Supplement: c4gc00571f1.pdf [file c4gc00571f1.pdf]

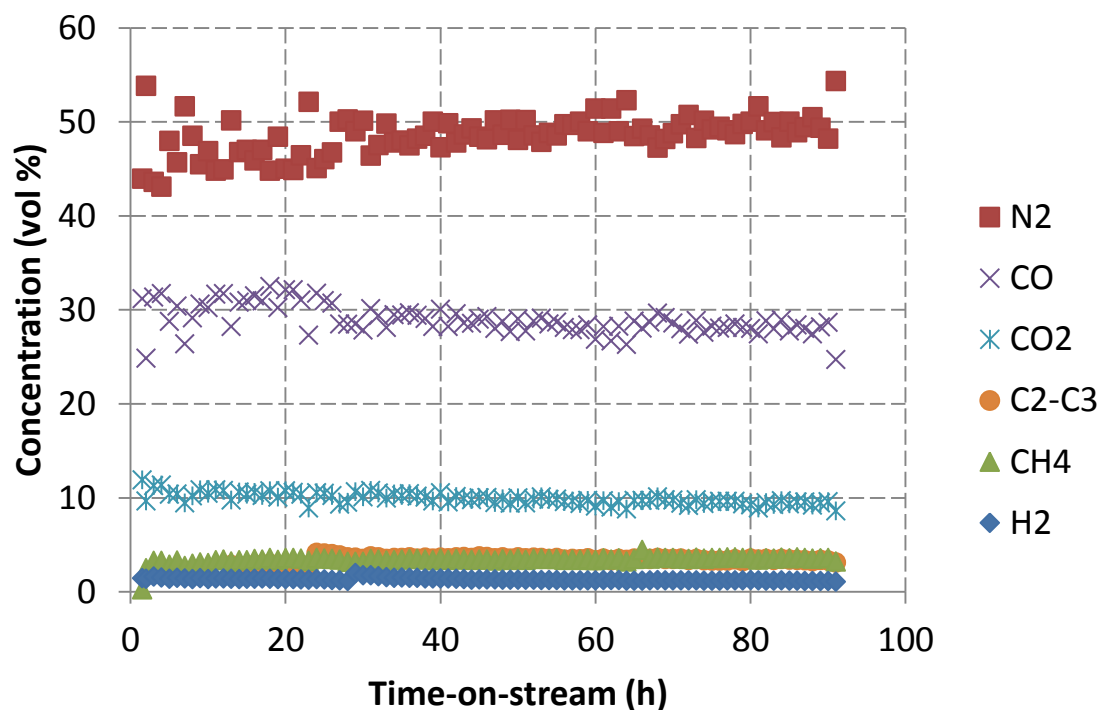

SM-1. CFP gas composition as a function of time-of-stream.

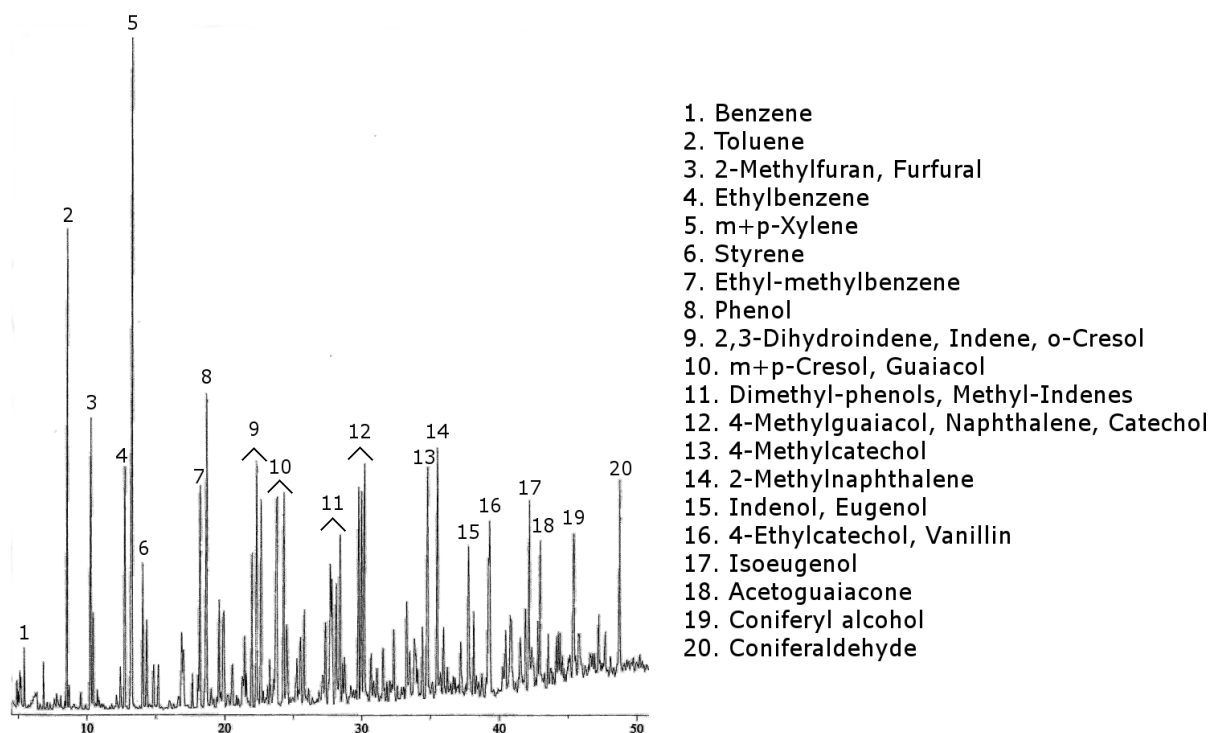

SM-2. Total ion chromatogram from the GC-MSD analysis of CFP oil.

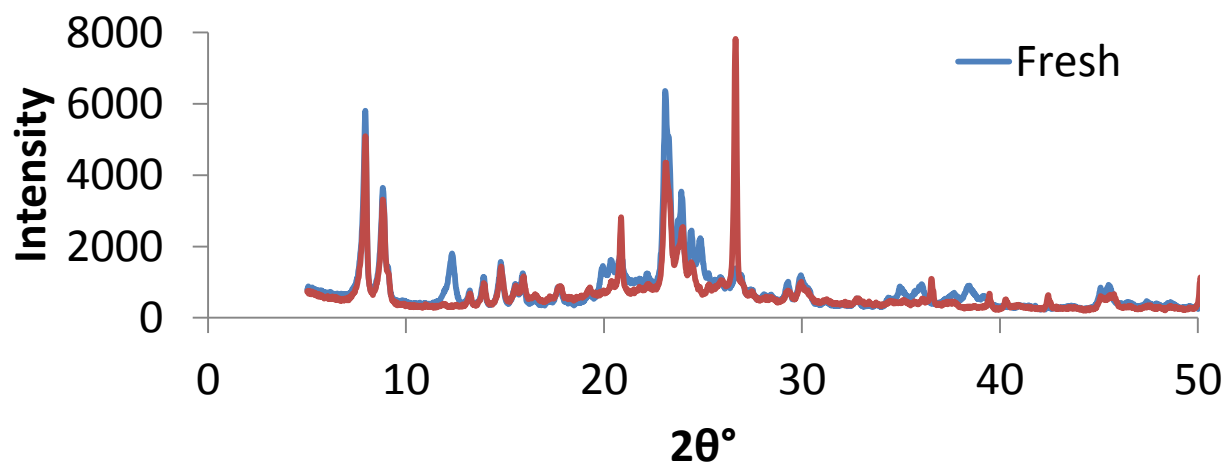

SM-3. XRD patterns of the fresh (blue) and spent (red) catalyst samples.

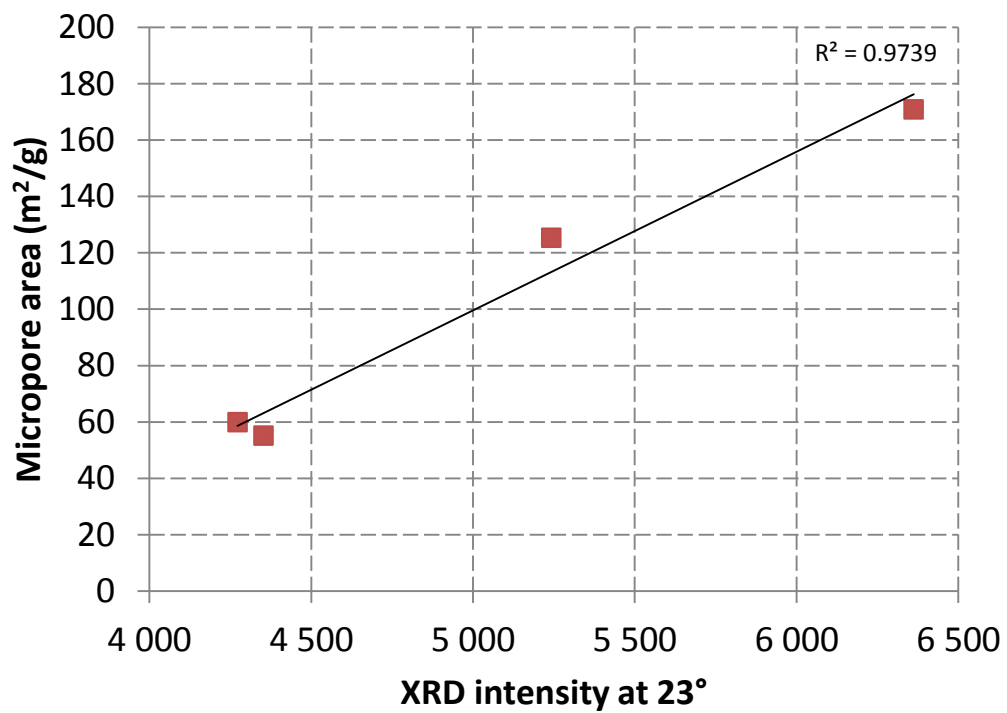

SM-4. Catalyst micropore area as a function of XRD peak intensity at at  $2\theta$   $23^\circ$ .

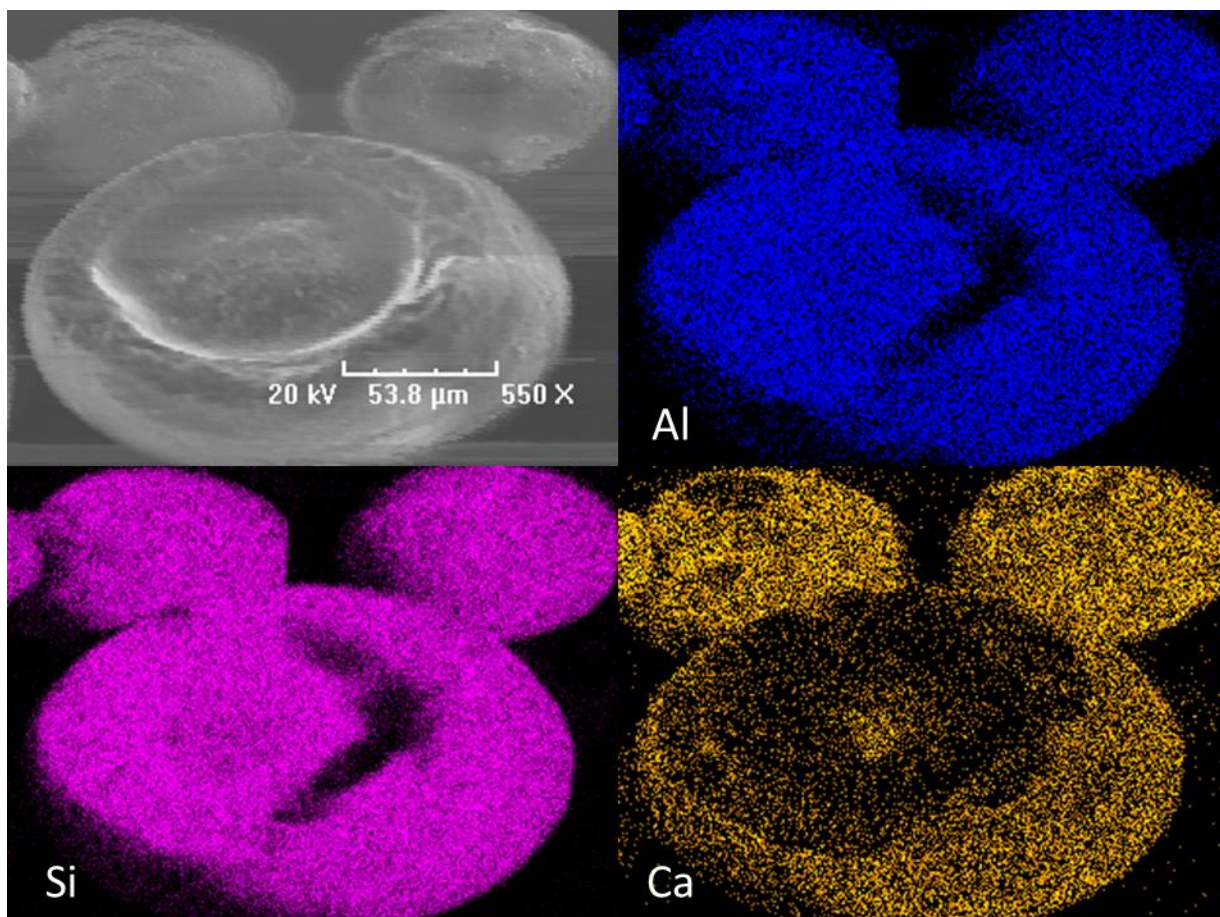

SM-5. EDS mapping of Si, Al and Ca for a catalyst particle after the experiment.
